# Supplementary material for: Examining long-term natural vegetation dynamics in the Aral Sea Basin applying the linear spectral mixture model
Source: PeerJ. 2021 Mar 2;9:e10747. doi: 10.7717/peerj.10747 (PMC7934649; doi:10.7717/peerj.10747)
Supplement: Supplemental Information 2 [file peerj-09-10747-s002.xlsx]

## Sheet: Sheet1
Temperature	1992	1993	1994	1995	1996	1997	1998	1999	2000	2001	2002	2003	2004	2005	2006	2007	2008	2009	2010	2011	2012	2013	2014	2015	2016	2017	2018
1	-4.31467	-5.59463	-5.84504	-5.9034	-8.11495	-4.38397	-7.14524	-4.31223	-4.24633	-6.10027	-2.2159	-4.03383	-3.43213	-5.38064	-9.85584	-3.44531	-12.7058	-4.9587	-4.02561	-7.05625	-7.79348	-4.15937	-5.31427	-4.25781	-2.15645	-4.65163	-6.04918
2	-2.78607	-3.61352	-7.50265	-2.61264	-5.33111	-4.36637	-4.26264	0.342799	-2.57208	-2.99511	-0.399253	-3.37038	-0.0158288	-6.93954	-0.637228	-1.375	-6.40747	-1.87357	-5.25659	-4.62697	-8.47548	-2.275	-8.47038	-1.77133	-0.29572	-4.40054	-3.42038
3	0.0872962	1.21698	1.86277	2.25224	-0.272079	3.17914	0.796196	1.2248	2.84314	5.27303	6.19327	1.03648	4.79341	5.18804	5.23179	1.92018	8.07317	4.87249	4.29742	2.13954	1.55917	5.63451	3.0322	2.0288	6.07622	2.30231	5.50849
4	10.3048	10.2936	9.54266	11.8158	8.82853	12.2376	10.9247	10.8694	14.0918	12.4054	10.0637	9.25245	10.6446	11.3779	12.2834	13.0037	12.2576	9.08268	12.0084	12.5445	13.9776	11.4546	9.97364	11.6234	12.0128	10.9454	10.9878
5	14.3348	15.3358	16.8285	16.6128	16.0141	16.2361	16.0015	16.6351	17.4627	19.5948	15.5958	15.1562	17.5012	16.6554	18.2041	17.4525	18.8465	16.637	16.9735	18.3335	17.8673	17.2506	18.2444	17.7815	17.558	18.37	16.39
6	20.441	20.9249	22.0522	21.9248	21.5209	22.138	22.1132	20.8854	21.535	22.4408	20.7206	20.1763	21.9541	22.464	22.3904	22.0194	22.9041	21.0383	22.4613	22.4007	22.4768	22.1836	22.7145	23.2878	22.3929	22.2971	21.7268
7	23.1247	22.9688	23.2212	24.4264	23.8202	24.2868	24.8653	23.3353	23.8166	23.0521	23.627	23.2372	23.2454	24.6578	23.3898	23.8186	24.8342	23.6865	23.8704	24.3067	24.8107	24.2206	23.479	25.1449	24.2096	24.8857	25.5474
8	20.4901	21.2763	22.5245	22.7076	21.4332	22.2091	23.3123	23.8353	23.2827	22.0842	23.1748	22.9453	22.313	21.7404	23.2736	22.8882	23.3892	22.304	23.4014	23.0554	23.7181	22.3664	23.4984	22.3865	23.1482	22.7246	22.7671
9	15.3838	16.092	15.3649	16.8613	17.1187	17.4308	17.529	17.6089	17.073	16.1492	17.6479	17.4992	17.7556	18.6438	16.9643	17.6351	16.8008	17.0571	17.0155	17.8429	17.2594	18.5368	17.4044	16.7423	18.7517	17.9645	17.2743
10	8.88349	8.5801	9.68818	9.52154	9.00082	11.6523	10.1039	11.9779	8.08947	9.46651	11.6018	11.2454	9.5053	11.1448	11.9655	9.20231	10.719	10.5359	11.6777	10.8552	10.7426	10.8145	8.98512	10.0154	8.15985	10.3946	10.0952
11	3.71664	-0.413315	4.56732	4.55122	1.46495	0.536481	2.52201	1.52208	0.915217	4.29687	4.26386	2.44062	5.13933	3.1034	3.69993	3.53981	3.36909	2.79545	4.63397	0.305095	2.49558	3.90503	0.989334	2.6303	0.467799	4.64735	1.19124
12	-1.99796	-4.91895	-3.67921	-4.50815	-1.54918	-4.3483	-1.42554	-0.952174	-1.6301	-2.96957	-6.62751	-2.768	-2.90041	-1.9644	-3.66107	-4.49993	-2.72113	-2.46365	-2.22806	-6.0962	-6.10842	-2.31012	-3.21719	-0.820109	-1.86291	-3.5072	-3.19939
Average（4-10）	16.1375	16.4959	17.0317	17.6958	16.8195	18.0273	17.8357	17.8782	17.9073	17.8847	17.4902	17.0731	17.5599	18.0977	18.353	18.0028	18.5359	17.1916	18.2012	18.477	18.6932	18.1182	17.7571	18.1403	18.0333	18.226	17.8269
Precipitation
	1992	1993	1994	1995	1996	1997	1998	1999	2000	2001	2002	2003	2004	2005	2006	2007	2008	2009	2010	2011	2012	2013	2014	2015	2016	2017	2018
1	40.4497	21.3478	27.9423	15.5136	17.352	24.5276	35.0942	25.5027	26.9658	17.6897	27.917	19.4594	36.5762	34.7964	39.894	14.3846	28.4626	27.0906	25.0238	14.5888	25.065	24.6578	23.0698	27.3093	30.9041	35.9813	13.0482
2	28.5182	39.2988	27.5732	29.5749	32.3575	16.152	47.4266	26.3135	19.497	18.1117	36.5745	43.0522	22.025	33.0976	28.1332	29.4612	24.3151	37.4142	42.3223	47.5974	31.1045	32.1233	26.3654	47.8317	14.5476	33.6759	29.0092
3	34.6484	45.9645	37.7575	26.9919	47.3111	35.4505	38.7164	39.0499	18.7892	26.8866	39.3437	53.2075	35.169	42.2166	28.7954	56.6711	15.6062	34.9349	38.5205	30.4612	44.2467	45.717	41.9978	47.3395	48.9609	37.2214	36.4379
4	42.7317	34.3062	30.3328	29.9603	38.7668	34.6204	47.5285	36.5997	16.4339	20.411	55.538	49.714	41.2929	28.4275	32.7452	32.9995	27.3936	51.3446	30.8368	22.3268	29.6255	39.1084	40.049	31.9365	41.6793	43.781	32.6421
5	36.1334	44.1708	24.2325	21.8803	28.1901	38.7757	39.6441	21.4027	17.6938	14.7808	33.7803	40.1481	26.1225	38.3363	15.1391	25.0143	20.1867	33.4272	38.3006	27.9528	23.4286	21.281	20.0465	32.9416	41.308	22.2183	27.3372
6	17.1514	22.9827	12.359	12.7595	17.6201	16.5607	20.1339	15.7372	16.2044	13.5899	21.7238	26.4874	12.056	13.8721	13.4403	14.904	12.327	15.706	17.4272	19.4927	14.0783	17.7458	10.1886	15.9337	23.7524	13.981	14.5219
7	9.87955	18.6295	14.0069	19.9394	13.4511	9.93152	14.9582	22.2192	15.3351	17.1939	7.03689	18.906	15.7379	12.1634	16.3647	16.7514	16.2616	9.43723	23.4677	10.7137	10.5905	15.0026	9.12439	13.3298	25.0164	9.66026	11.0442
8	16.626	9.56732	9.94341	10.7531	11.7563	14.5904	11.9274	10.2968	9.52507	10.4025	6.97188	11.4942	13.2556	12.9181	12.1354	7.36902	12.3846	12.7188	18.0796	12.831	12.0918	19.8783	8.29558	16.8813	8.53274	9.60014	11.6072
9	10.8914	5.91372	7.94429	6.74687	7.44049	2.8553	7.34327	9.71596	9.47874	5.13512	4.05503	8.03804	3.87908	4.76671	8.33967	5.54715	7.87038	11.9404	7.84959	8.81128	8.73716	6.58865	9.91902	8.09361	8.45054	7.31168	6.79946
10	9.56033	11.1126	11.7089	18.0622	16.843	10.6446	9.62405	10.4159	25.8361	24.5993	6.93811	13.5763	17.0215	7.93614	21.7352	6.73173	23.8004	8.06563	14.7625	21.6546	10.4411	13.9898	26.571	24.3378	15.0684	14.1988	17.6017
11	10.9168	37.2071	31.6312	7.79327	11.1922	17.2358	13.381	38.6593	19.9853	23.3986	15.7839	35.7556	29.3053	18.1656	30.2396	15.382	15.3998	24.3997	10.4981	31.7562	21.1602	15.4486	32.4348	33.9735	25.2543	15.8112	26.7536
12	33.7799	20.0039	33.405	16.0647	10.1209	22.6065	13.8215	8.59932	23.595	28.214	37.9299	23.4954	37.3766	18.7635	28.4218	24.8621	27.6888	24.6379	9.02418	16.7697	31.5919	28.8167	12.6035	24.4251	34.6723	20.3635	16.7508
Sum (4-10)	142.974	146.683	110.528	120.102	134.068	127.979	151.159	126.388	110.507	106.112	136.044	168.364	129.365	118.42	119.9	109.317	120.224	142.64	150.724	123.783	108.993	133.595	124.194	143.454	163.808	120.751	121.554
